# Supplementary material
Source: Research Square preprint supplement (doi:10.21203/rs.3.rs-9059381/v1)
Supplement: Supplementary file 1 [file b1c524853703974aed7d55f7.doc]

**Supplementary** **Table 1** Draft transcriptome assembly summary of litchi pericarp

| **Transcriptome assembly details** | **Number of transcripts** |
| --- | --- |
| Total trinity transcripts | 83362 |
| Total trinity genes | 40825 |
| Percent GC | 41.64 |
| Contig N10 | 4158 |
| Contig N20 | 3143 |
| Contig N30 | 2599 |
| Contig N40 | 2195 |
| Contig N50 | 1882 |
| Median contigs length | 881 |
| Average contigs | 1212.24 |
| Total assembled bases | 101054980 |
